# Supplementary material
Source: Springer Nature journal article supplement (https://www.springermedizin.de/resource/supplementary/12904_2008_55_MOESM5_ESM.pdf/9518044)

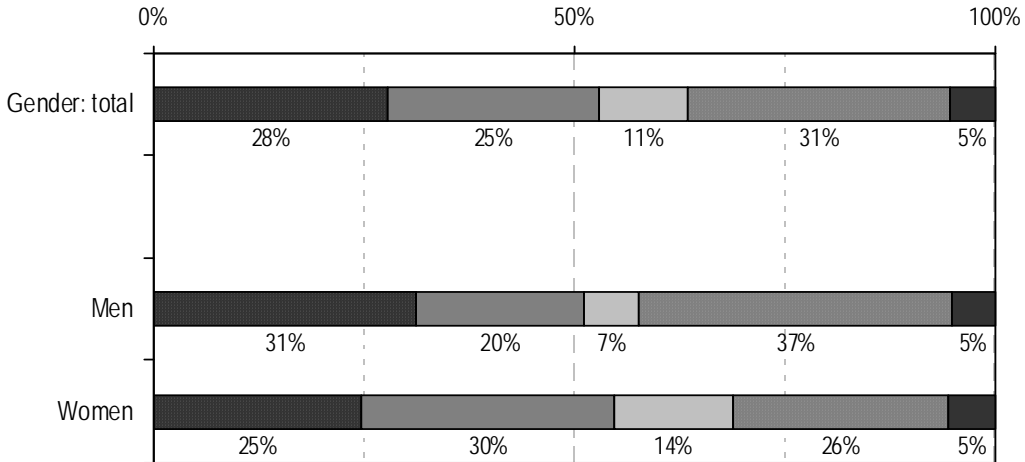

Hospital
  Nursing home
  Home f/t elderly
  Home
  Other

Supplement: MOESM5 [file 9518044]
